# Supplementary material for: Double Valorization for a Discard—α-Chitin and Calcium Lactate Production from the Crab Polybius henslowii Using a Deep Eutectic Solvent Approach
Source: MDPI journal article supplement (doi:10.3390/md20110717), 2022-11-16
Supplement: s1 [file s1]

## Supplementary Materials:

# Double Valorization for a Discard— $\alpha$ -chitin and Calcium Lactate Production from the Crab *Polybius henslowii* Using a Deep Eutectic Solvent Approach

Colin McReynolds <sup>1,2,†</sup>, Amandine Adrien <sup>1,2,†</sup>, Arnaud Petitpas <sup>1,2</sup>, Laurent Rubatat <sup>1</sup>  
and Susana C. M. Fernandes <sup>1,2,\*</sup>

<sup>1</sup> Université de Pau et des Pays de l'Adour, E2S UPPA, IPREM, CNRS, 64 600 Anglet, France; [c.mc-reynolds@univ-pau.fr](mailto:c.mc-reynolds@univ-pau.fr) (C.M.); [amandine.adrien@univ-pau.fr](mailto:amandine.adrien@univ-pau.fr) (A.A.); [arnaud.petitpas@univ-pau.fr](mailto:arnaud.petitpas@univ-pau.fr) (A.P.); [laurent.rubatat@univ-pau.fr](mailto:laurent.rubatat@univ-pau.fr) (L.R.)

<sup>2</sup> MANTA—Marine Materials Research Group, Université de Pau et des Pays de l'Adour, E2S UPPA, 64 600 Anglet, France

\* Correspondence: [susana.fernandes@univ-pau.fr](mailto:susana.fernandes@univ-pau.fr)

† These authors contributed equally to this work.

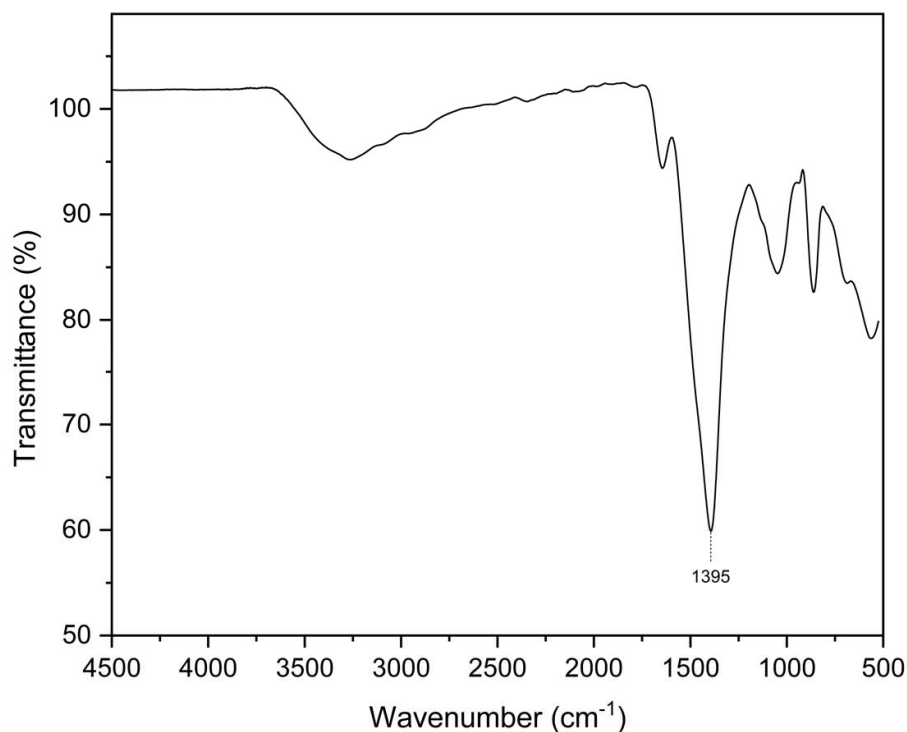

Figure S1. ATR-FTIR spectrum of raw *P. henslowii* carapace.

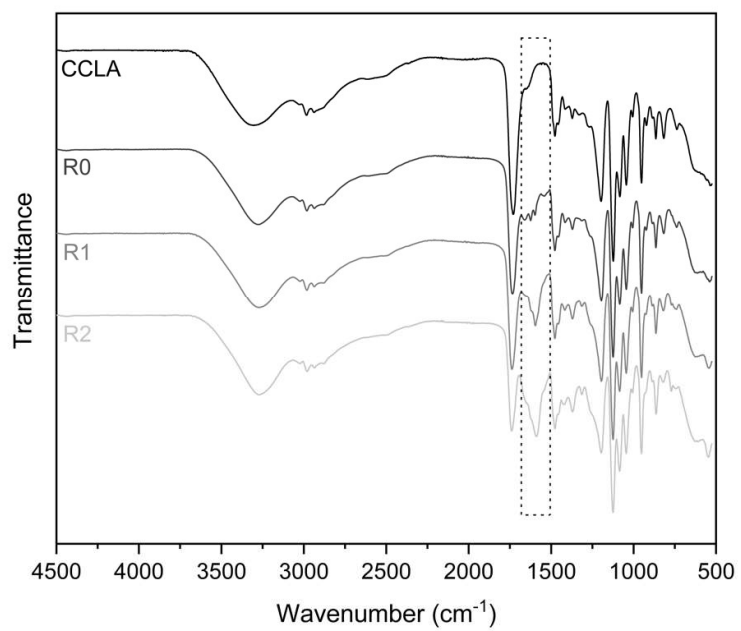

**Figure S2.** ATR-FTIR spectra of DES post-extraction and ethanol washing. The dotted rectangle is included to emphasize where major changes occurred.
